# Supplementary material
Source: publisher figshare collection journal article supplement (https://tandf.figshare.com/articles/dataset/_/5752941)
Supplement: Supplementary file 1 [file 1]

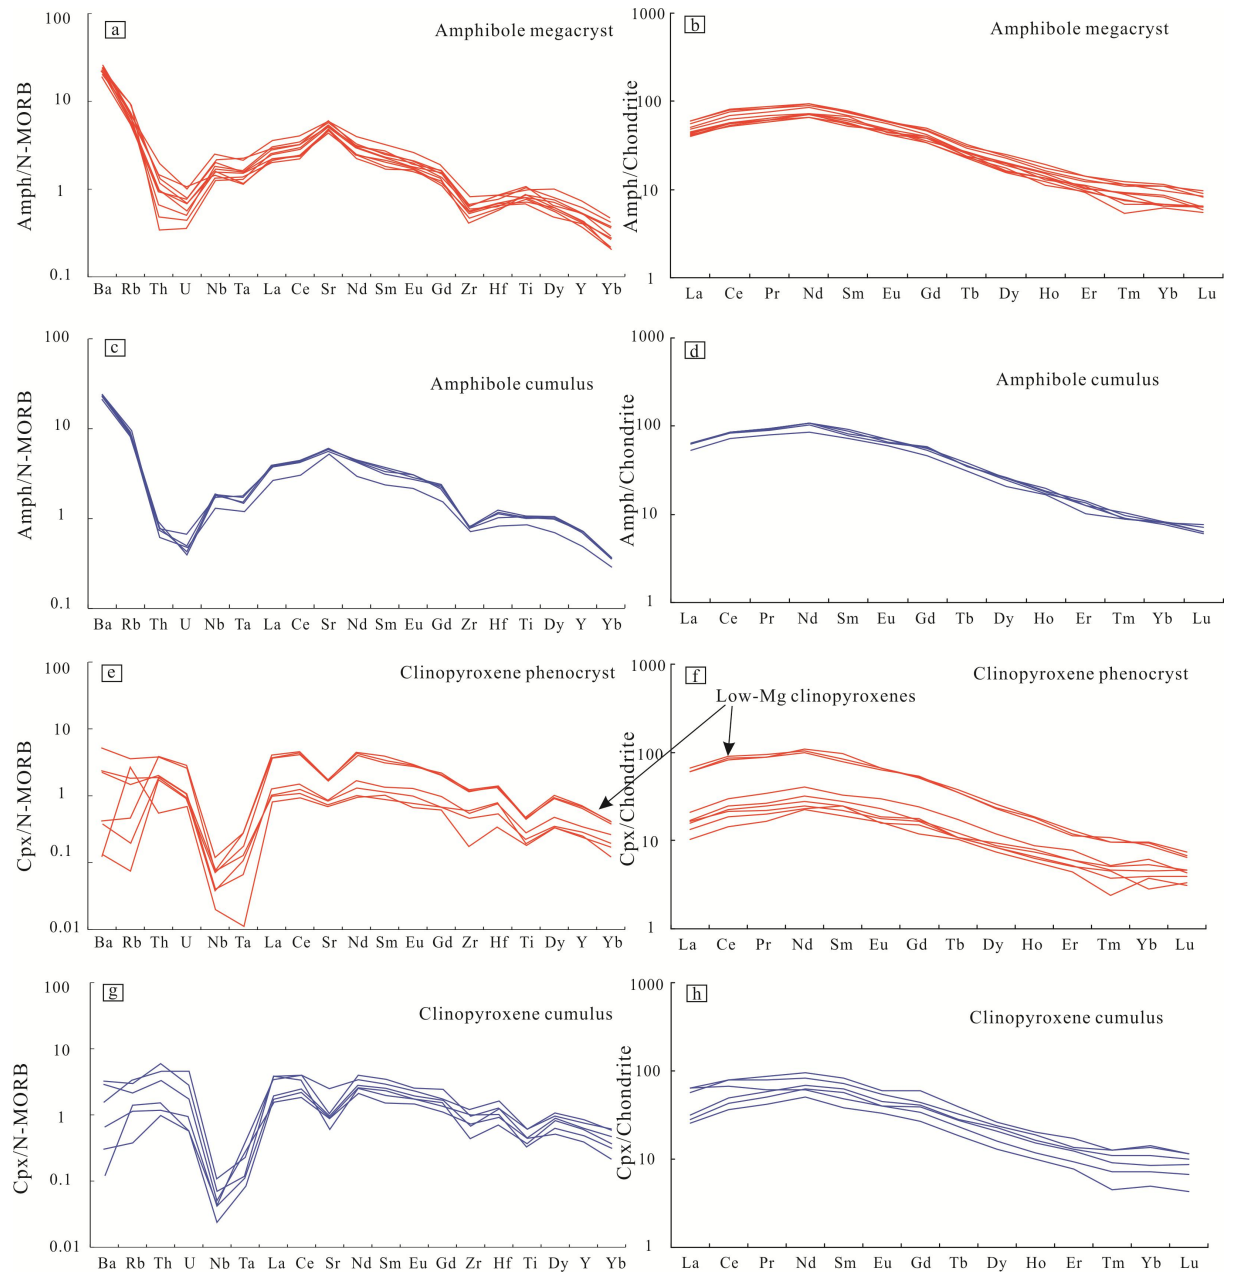

**Supplementary figure 1.** Chondrite-normalized rare earth element and N-MORB incompatible element patterns for amphibole and clinopyroxene from amphibole cumulates and gabbros. Chondrite values are from McDonough and Sun (1995). N-MORB values are from Hofmann (1988).
